# Supplementary material
Source: PubMed Central journal article supplement (PMC4607751)
Supplement: supp_kfv102_toxsci-15-0010-File010.pdf [file supp_kfv102_toxsci-15-0010-File010.pdf]

### A TCA uptake by human hepatocytes

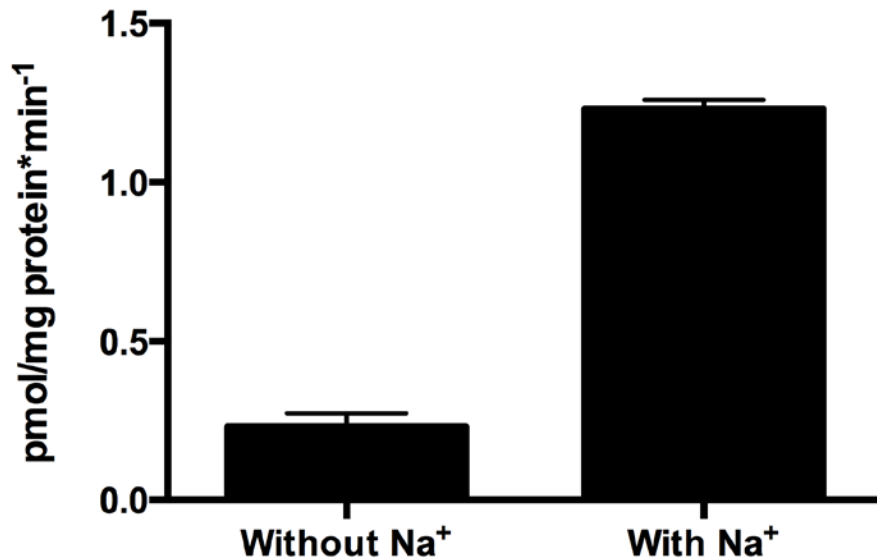

### B TCA uptake by rat hepatocytes

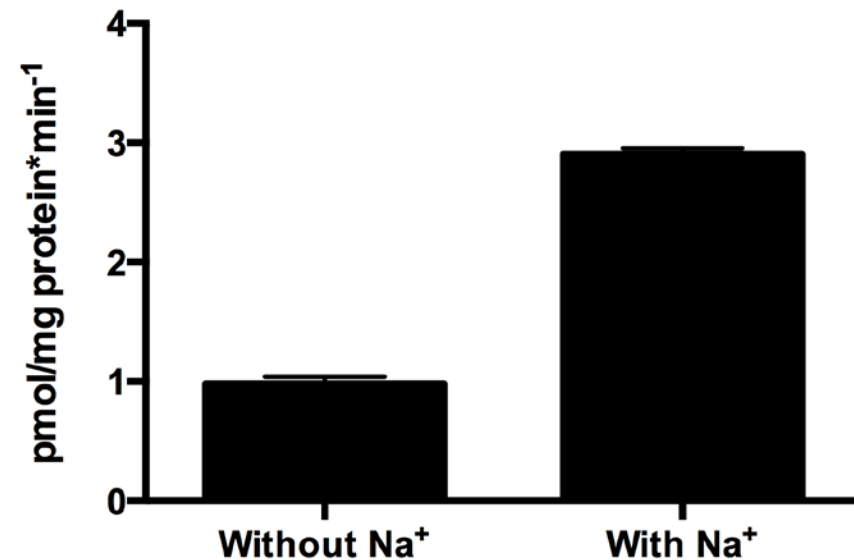

**Supplemental figure 1.** Taurocholate uptake mediated by human and rat hepatocytes. Uptake of 30 nM [<sup>3</sup>H]-TCA was measured with freshly isolated human (A) or rat (B) hepatocytes in the absence or presence of sodium for 1 min at 37°C. Each bar represents the mean ± SD of the uptake of triplicates. The results were corrected for total protein concentration in each well.

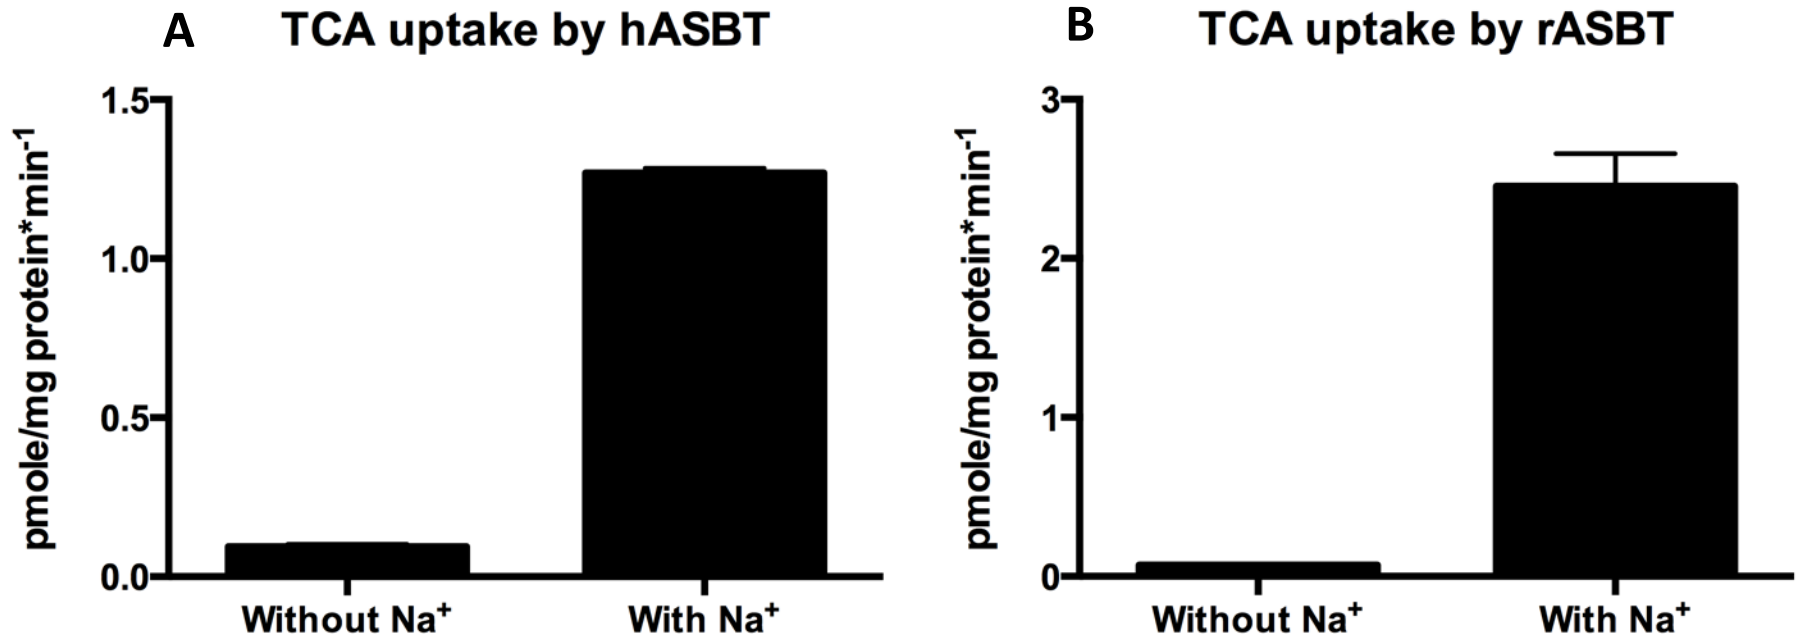

**Supplemental figure 2.** Taurocholate uptake mediated by human and rat ASBT. Using HEK293 cells transiently transfected with human (A) or rat (B) ASBT cDNA, uptake of 30 nM [<sup>3</sup>H]-TCA was measured in the absence or presence of sodium for 1 min at 37°C. Each bar represents the mean ± SD of the uptake of triplicates. The results were corrected for total protein concentration in each well.

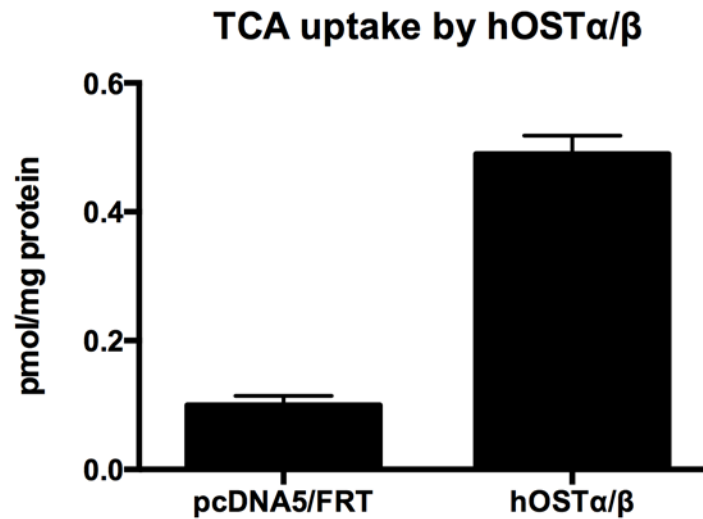

**Supplemental figure 3.** Human OST $\alpha$ / $\beta$ -mediated transport of TCA. Using HEK293 cells transiently transfected with human OST $\alpha$  and OST $\beta$  cDNA containing plasmid, uptake of 30 nM [ $^3$ H]-TCA was measured for 2 min at 37°C. Each bar represents the mean  $\pm$  SD of the uptake of triplicates. The results were corrected for total protein concentration in each well.
